# Supplementary material for: In vitro antibacterial activity of bioactive glass S53P4 on multiresistant pathogens causing osteomyelitis and prosthetic joint infection
Source: Springer Nature journal article supplement (doi:10.1186/s12879-018-3069-x), 2018-04-03
Supplement: MOESM1 [file 15585492]

## Additional tables

Details of the antimicrobial resistance profiles is described in Tables S1, S2, S3 and S4.

**Table S1:** Antibiotic resistant profile of oxacillin-resistant *Staphylococcus aureus* strains.

| Antibiotics                        | Clinical Case Number |      |       |       |       |
|------------------------------------|----------------------|------|-------|-------|-------|
|                                    | SS32                 | SS53 | SS160 | SS164 | SS400 |
| Penicillin                         | R <sup>&amp;</sup>   | R    | R     | R     | R     |
| Oxacillin                          | R                    | R    | R     | R     | R     |
| Teicoplanin                        | S <sup>a</sup>       | S    | S     | S     | S     |
| Vancomycin (MIC <sup>#</sup> µg/L) | 0.3                  | 1    | 0.5   | 0.5   | 1     |
| Erythromycin                       | R                    | S    | S     | S     | S     |
| Ciprofloxacin                      | R                    | R    | R     | R     | R     |
| Clindamycin                        | R                    | R    | R     | R     | R     |
| TMP/SMX**                          | S                    | S    | S     | S     | S     |
| Tetracycline                       | S                    | S    | S     | S     | S     |

R<sup>&</sup> = Resistant to tested antibiotic; S<sup>a</sup> = Sensitive to tested antibiotic; SMX/TMP\*\* = Sulfamethoxazole / Trimethoprim; MIC<sup>#</sup> = Minimal Inhibitory Concentration value, expressed in µg/L, obtained by means of Etest.

**Table S2:** Antibiotic resistant profile of oxacillin-resistant coagulase-negative *Staphylococcus* strains.

| Antibiotics                        | Clinical Case Number |       |       |       |       |
|------------------------------------|----------------------|-------|-------|-------|-------|
|                                    | SS112                | SS119 | SS123 | SS126 | SS141 |
| Penicillin                         | R <sup>&amp;</sup>   | R     | R     | R     | R     |
| Oxacillin                          | R                    | R     | R     | R     | R     |
| Teicoplanin                        | S <sup>a</sup>       | R     | R     | R     | S     |
| Vancomycin (MIC <sup>#</sup> µg/l) | 1                    | 1.5   | 1     | 0.5   | 0.75  |
| Erythromycin                       | R                    | R     | R     | R     | R     |
| Ciprofloxacin                      | R                    | S     | R     | R     | S     |
| Levofloxacin                       | R                    | S     | R     | R     | S     |
| Clindamycin                        | R                    | R     | R     | R     | S     |
| SMX/TMP**                          | R                    | S     | R     | R     | S     |
| Tetracycline                       | S                    | S     | S     | R     | S     |
| Chloramphenicol                    | R                    | S     | R     | R     | S     |

R<sup>&</sup> = Resistant to tested antibiotic; S<sup>a</sup> = Sensitive to tested antibiotic; SMX/TMP\*\* = Sulfamethoxazole / Trimethoprim; MIC<sup>#</sup> = Minimal Inhibitory Concentration value, expressed in µg/L, obtained by means of Etest

**Table S3:** Antibiotic resistant profile of *Pseudomonas aeruginosa* strains.

| Antibiotics                       | Clinical Case Number/ ATCC strain |       |                |             |            |
|-----------------------------------|-----------------------------------|-------|----------------|-------------|------------|
|                                   | SS461                             | SS462 | SS486          | SS487       | ATCC 27853 |
| Gentamicin                        | R <sup>&amp;</sup>                | R     | S <sup>a</sup> | R           | S          |
| Amikacin                          | R                                 | R     | S              | R           | S          |
| Ceftazidime                       | S                                 | S     | S              | R           | S          |
| Cefepime                          | R                                 | R     | S              | R           | S          |
| Aztreonam                         | R                                 | R     | R              | S           | S          |
| Meropenem                         | R                                 | R     | R              | R           | S          |
| Imipenem                          | R                                 | S     | R              | R           | S          |
| Pip/Taz <sup>b</sup>              | R                                 | R     | S              | S           | S          |
| Tic/Clv <sup>c</sup>              | R                                 | R     | R              | S           | S          |
| Ciprofloxacin                     | R                                 | R     | S              | R           | S          |
| Levofloxacin                      | R                                 | R     | S              | R           | S          |
| Polymyxin (MIC <sup>#</sup> µg/l) | 1.0                               | 1.0   | 0.45           | Not Tested* | 0.25       |

R<sup>&</sup> = Resistant to tested antibiotic; S<sup>a</sup> = Sensitive to tested antibiotic; Pip/Taz<sup>b</sup> = Piperacillin / Tazobactam; Tic/Clv<sup>c</sup> = Ticarcillin / Clavulanate; MIC<sup>#</sup> = Minimal Inhibitory Concentration, expressed in µg/L, obtained by means of Etest; \* = the test was not performed.

**Table S4:** Antibiotic resistant profile of *Klebsiella pneumoniae* strains.

| Antibiotic                        | Clinical Case Number/ATCC strain |              |             |                |             |
|-----------------------------------|----------------------------------|--------------|-------------|----------------|-------------|
|                                   | SS71 (KPC)                       | SS290 (ESBL) | SS313 (KPC) | SS443 (ESBL)   | ATCC 700603 |
| Ampicillin                        | R <sup>&amp;</sup>               | R            | R           | R              | R           |
| Amx / Clv <sup>d</sup>            | R                                | R            | R           | S <sup>a</sup> | R           |
| Gentamicin                        | R                                | S            | R           | R              | S           |
| Amikacin                          | S                                | S            | S           | R              | S           |
| Ceftriaxone                       | R                                | R            | R           | R              | R           |
| Ceftazidime                       | R                                | R            | R           | R              | R           |
| Cefepime                          | R                                | R            | R           | R              | R           |
| Aztreonam                         | R                                | R            | R           | R              | R           |
| Meropenem                         | R                                | S            | R           | S              | S           |
| Imipenem                          | R                                | S            | R           | S              | S           |
| Ertapenem                         | R                                | S            | R           | S              | S           |
| Ciprofloxacin                     | R                                | R            | R           | R              | R           |
| Levofloxacin                      | R                                | R            | R           | R              | R           |
| SMX/TMP <sup>**</sup>             | R                                | R            | R           | R              | R           |
| Chloramphenicol                   | R                                | R            | R           | R              | R           |
| Tigecycline                       | S                                | S            | R           | S              | S           |
| Polymyxin (MIC <sup>#</sup> µg/L) | 1                                | 1            | 0.38        | 1              | 1           |

R<sup>&</sup> = Resistant to tested antibiotic; S<sup>a</sup> = Sensitive to tested antibiotic; Amx / Clv<sup>d</sup> = Amoxicillin/Clavulanate; SMX/TMP<sup>\*\*</sup> = Sulfamethoxazole/Trimethoprim; MIC<sup>#</sup> = Minimal Inhibitory Concentration value, expressed in µg/L, obtained by means of Etest.
